# Supplementary material for: Solvothermal synthesis, structures and physical properties of four new complexes constructed from multi-variant tricarboxylate ligand and pyridyl-based ligands
Source: Royal Society of Chemistry journal article supplement (doi:10.1039/c003986a), 2010-09-08
Supplement: c003986a.pdf [file c003986a.pdf]

## Supporting Information

### **Solvothermal synthesis, structures and physical properties of four new complexes constructed from multivariant tricarboxylate ligand and pyridyl-based ligands**

**Chang-Chun Ji,<sup>a</sup> Jing Li,<sup>a</sup> Yi-Zhi Li,<sup>a</sup> Zi-Jian Guo<sup>a</sup> and He-Gen Zheng<sup>\*, a, b</sup>**

*<sup>a</sup>State Key Laboratory of Coordination Chemistry, School of Chemistry and Chemical Engineering, Nanjing National Laboratory of Microstructures, Nanjing University, Nanjing 210093, P. R. China*

*<sup>b</sup>State Key Laboratory of Structural Chemistry, Fujian Institute of Research on the Structure of Matter, Chinese Academy of Sciences, Fuzhou 350002, P. R. China*

**Table S1 Selected Bond Lengths (Å) and Angles (deg) for Complexs 1-4**

| Complex 1  |            |              |            |
|------------|------------|--------------|------------|
| Cd1-O1     | 2.252(5)   | Cd1-O2       | 2.564(4)   |
| Cd1-O8     | 2.267(5)   | Cd1-O3a      | 2.572(4)   |
| Cd1-O7     | 2.295(4)   | Cd2-O5       | 2.219(5)   |
| Cd1-O4a    | 2.292(5)   | Cd2-O10      | 2.309(5)   |
| Cd1-O9     | 2.314(5)   | Cd2-O11      | 2.246(6)   |
| O1-Cd1-O8  | 138.92(17) | O9-Cd1-O2    | 97.11(16)  |
| O1-Cd1-O7  | 88.54(17)  | O1-Cd1-O3a   | 136.16(15) |
| O8-Cd1-O7  | 95.38(19)  | O8-Cd1-O3a   | 84.79(15)  |
| O1-Cd1-O4a | 84.03(16)  | O7-Cd1-O3a   | 82.75(16)  |
| O8-Cd1-O4a | 136.77(18) | O4a-Cd1-O3a  | 53.10(15)  |
| O7-Cd1-O4a | 89.12(18)  | O9-Cd1-O3a   | 90.46(16)  |
| O1-Cd1-O9  | 96.87(17)  | O2-Cd1-O3a   | 167.20(14) |
| O8-Cd1-O9  | 83.30(19)  | O5b-Cd2-O5   | 171.4(3)   |
| O7-Cd1-O9  | 173.17(18) | O5-Cd2-O11   | 85.69(13)  |
| O4a-Cd1-O9 | 87.31(17)  | O5b-Cd2-O10  | 107.25(18) |
| O1-Cd1-O2  | 53.24(14)  | O5-Cd2-O10   | 78.81(18)  |
| O8-Cd1-O2  | 85.86(16)  | O11-Cd2-O10  | 133.00(15) |
| O7-Cd1-O2  | 89.45(17)  | O10-Cd2-O10b | 94.0(3)    |
| O4a-Cd1-O2 | 137.27(16) |              |            |
| Complex 2  |            |              |            |
| Cd1-O1     | 2.321(3)   | Cd1-O7       | 2.366(4)   |
| Cd1-O2     | 2.413(3)   | Cd1-O8       | 2.333(4)   |
| Cd1-O5a    | 2.228(3)   | Cd1-N1       | 2.214(4)   |
| N1-Cd1-O5a | 134.03(14) | O1-Cd1-O7    | 86.51(14)  |

---

|                  |            |             |            |
|------------------|------------|-------------|------------|
| N1-Cd1-O1        | 143.40(14) | O8-Cd1-O7   | 176.39(12) |
| O5a-Cd1-O1       | 81.97(12)  | N1-Cd1-O2   | 89.97(13)  |
| N1-Cd1-O8        | 89.46(14)  | O5a-Cd1-O2  | 135.48(11) |
| O5a-Cd1-O8       | 91.85(12)  | O1-Cd1-O2   | 53.60(11)  |
| O1-Cd1-O8        | 96.71(15)  | O8-Cd1-O2   | 95.55(12)  |
| N1-Cd1-O7        | 86.97(14)  | O7-Cd1-O2   | 85.02(11)  |
| O5a-Cd1-O7       | 90.22(12)  |             |            |
| <b>Complex 3</b> |            |             |            |
| Mn1-O5a          | 2.118(3)   | Mn1-N1      | 2.221(3)   |
| Mn1-O3           | 2.149(3)   | Mn1-O5b     | 2.314(4)   |
| Mn1-O7           | 2.196(3)   | Mn1-O4      | 2.369(3)   |
| O5a-Mn1-O3       | 144.66(11) | O7-Mn1-O5b  | 175.10(12) |
| O5a-Mn1-O7       | 98.87(12)  | N1-Mn1-O5b  | 88.85(13)  |
| O3-Mn1-O7        | 93.97(12)  | O5a-Mn1-O4  | 87.95(11)  |
| O5a-Mn1-N1       | 120.58(13) | O3-Mn1-O4   | 57.91(10)  |
| O3-Mn1-N1        | 92.34(12)  | O7-Mn1-O4   | 96.03(12)  |
| O7-Mn1-N1        | 88.69(13)  | N1-Mn1-O4   | 150.08(12) |
| O5a-Mn1-O5b      | 78.77(12)  | O5b-Mn1-O4  | 88.21(12)  |
| O3-Mn1-O5b       | 90.37(12)  |             |            |
| <b>Complex 4</b> |            |             |            |
| Co1-O3           | 2.012(3)   | Co1-O7      | 2.097(4)   |
| Co1-O5a          | 2.027(3)   | Co1-O5b     | 2.298(3)   |
| Co1-N1           | 2.114(4)   |             |            |
| O3-Co1-O5a       | 139.33(13) | N1-Co1-O5b  | 90.95(14)  |
| O5a-Co1-N1       | 121.38(15) | O3-Co1-O5b  | 87.80(13)  |
| O3-Co1-N1        | 96.25(15)  | O5a-Co1-O5b | 77.53(14)  |
| O3-Co1-O7        | 94.68(13)  | N1-Co1-O7   | 90.89(15)  |

---

O5a-Co1-O7

99.20(14)

O7-Co1-O5b

176.73(13)

Symmetry codes: for **1**: (a)  $x+1/2, y-1/2, z$ ; (b)  $-x, y, -z$ ; for **2**: (a)  $x, y+1, z$ ; for **3**: (a)  $x, y+1, z$ ; (b)  $-x+1, -y+1, -z+1$ ; for **4**: (a)  $x, y+1, z$ ; (b)  $-x+1, -y+1, -z+1$ .

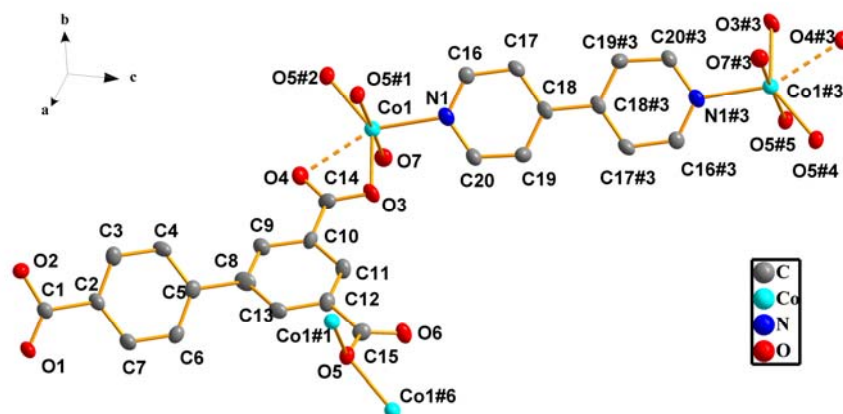

**Fig. S1** Coordination environment of the Co(II) ion in **4** with 30% ellipsoid probability. The hydrogen atoms are omitted for clarity. Symmetry codes: #1 =  $1-x, 1-y, 1-z$ ; #2 =  $x, 1+y, z$ ; #3 =  $1-x, 2-y, 2-z$ ; #4 =  $1-x, 1-y, 2-z$ ; #5 =  $x, 1+y, 1+z$ ; #6 =  $x, -1+y, z$ . Dashed lines mean weak interactions.

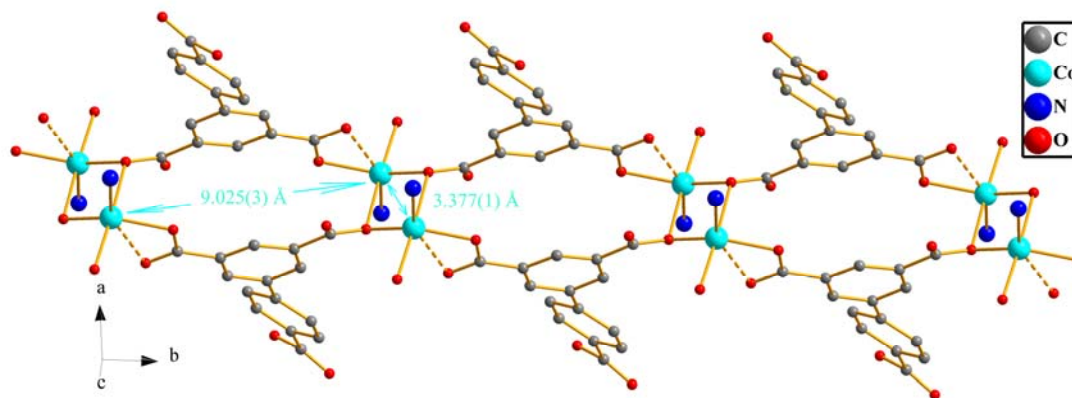

**Fig. S2** View of a 1D ribbonlike chain of Co atoms in **4** bridged by  $HL^{2-}$  ligands. The hydrogen atoms and bipy ligands are omitted for clarity. Dashed lines mean weak interactions.

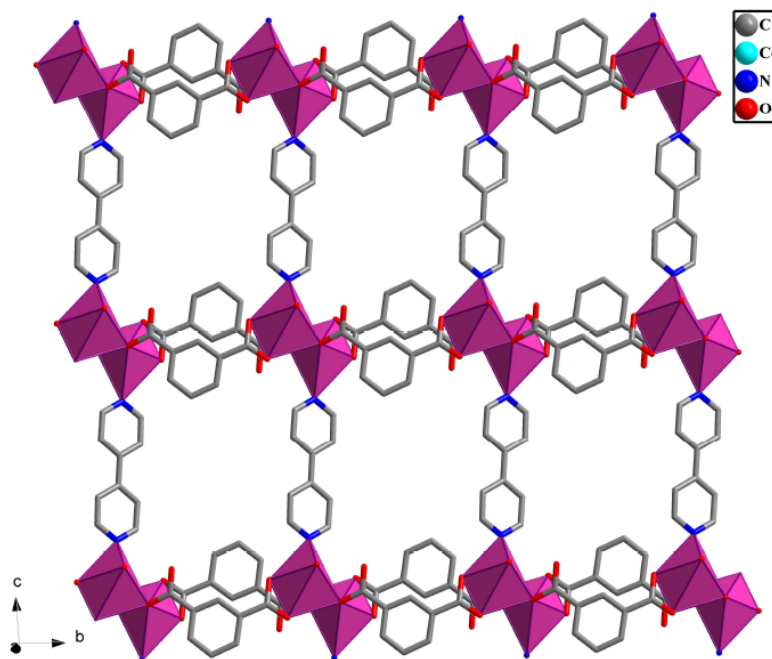

**Fig. S3** The 2D layer formed with ribbonlike chains pillared by rigid bipy ligands of **4**. The hydrogen atoms and benzyloxy groups are omitted for clarity.

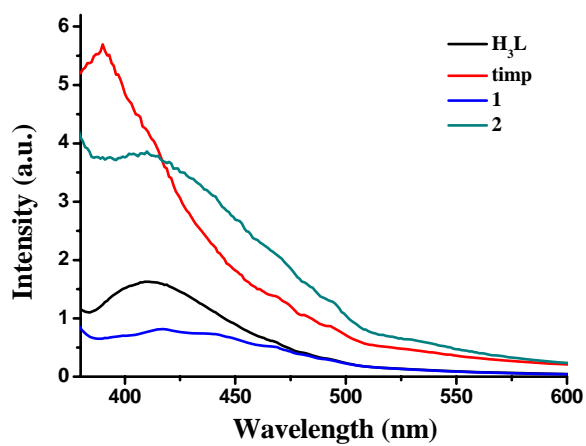

**Fig. S4** Solid-state photoluminescent spectra of **1**, **2**, H<sub>3</sub>L ligand and timp ligand at room temperature.

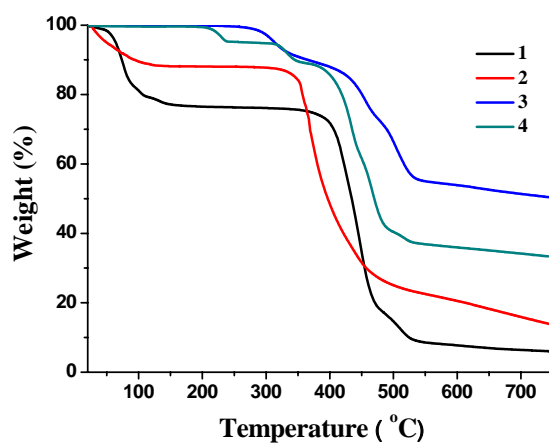

**Fig. S5** The TGA diagrams of complexes **1-4**

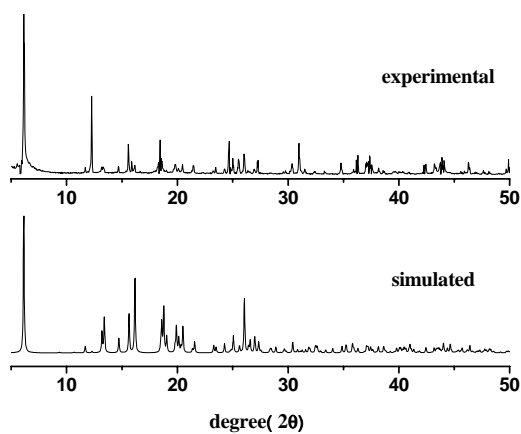

**Fig. S6** Powder X-ray diffraction patterns of complex **1**

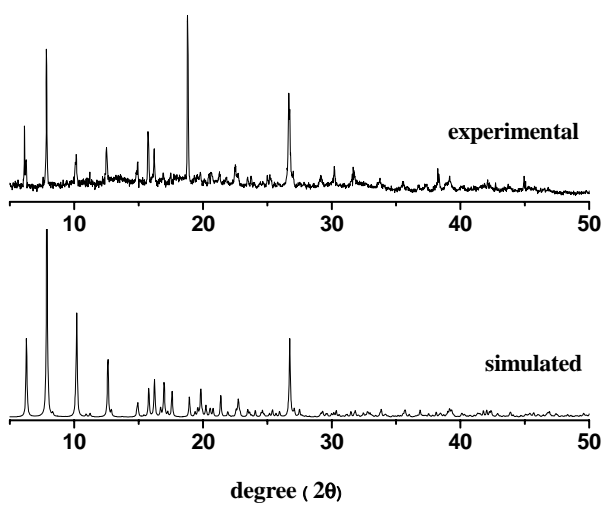

**Fig. S7** Powder X-ray diffraction patterns of complex **2**

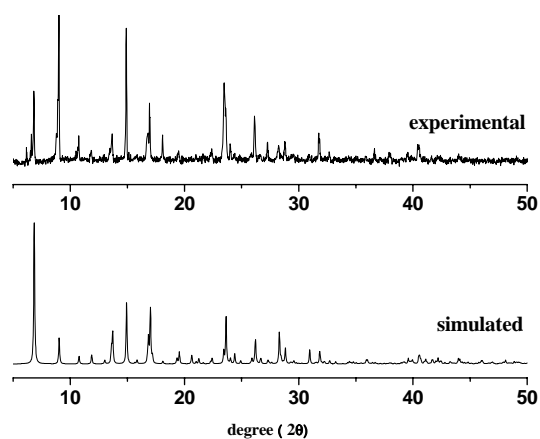

**Fig. S8** Powder X-ray diffraction patterns of complex 3

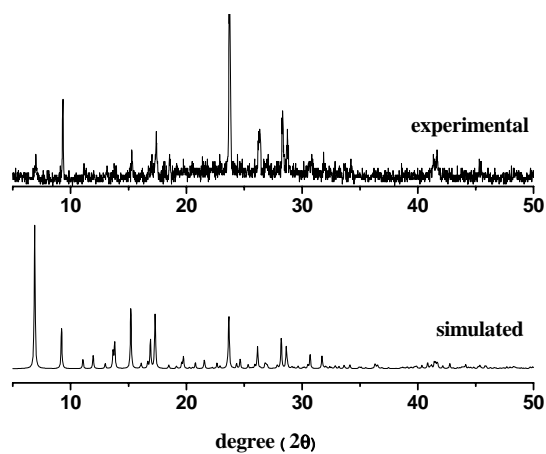

**Fig. S9** Powder X-ray diffraction patterns of complex 4
